# Supplementary figures and images for: pRb-mediated control of epithelial cell proliferation and Indian Hedgehog expression in mouse intestinal development
Source: Springer Nature journal article supplement (doi:10.1186/1471-213x-7-6), 2007-01-26

A

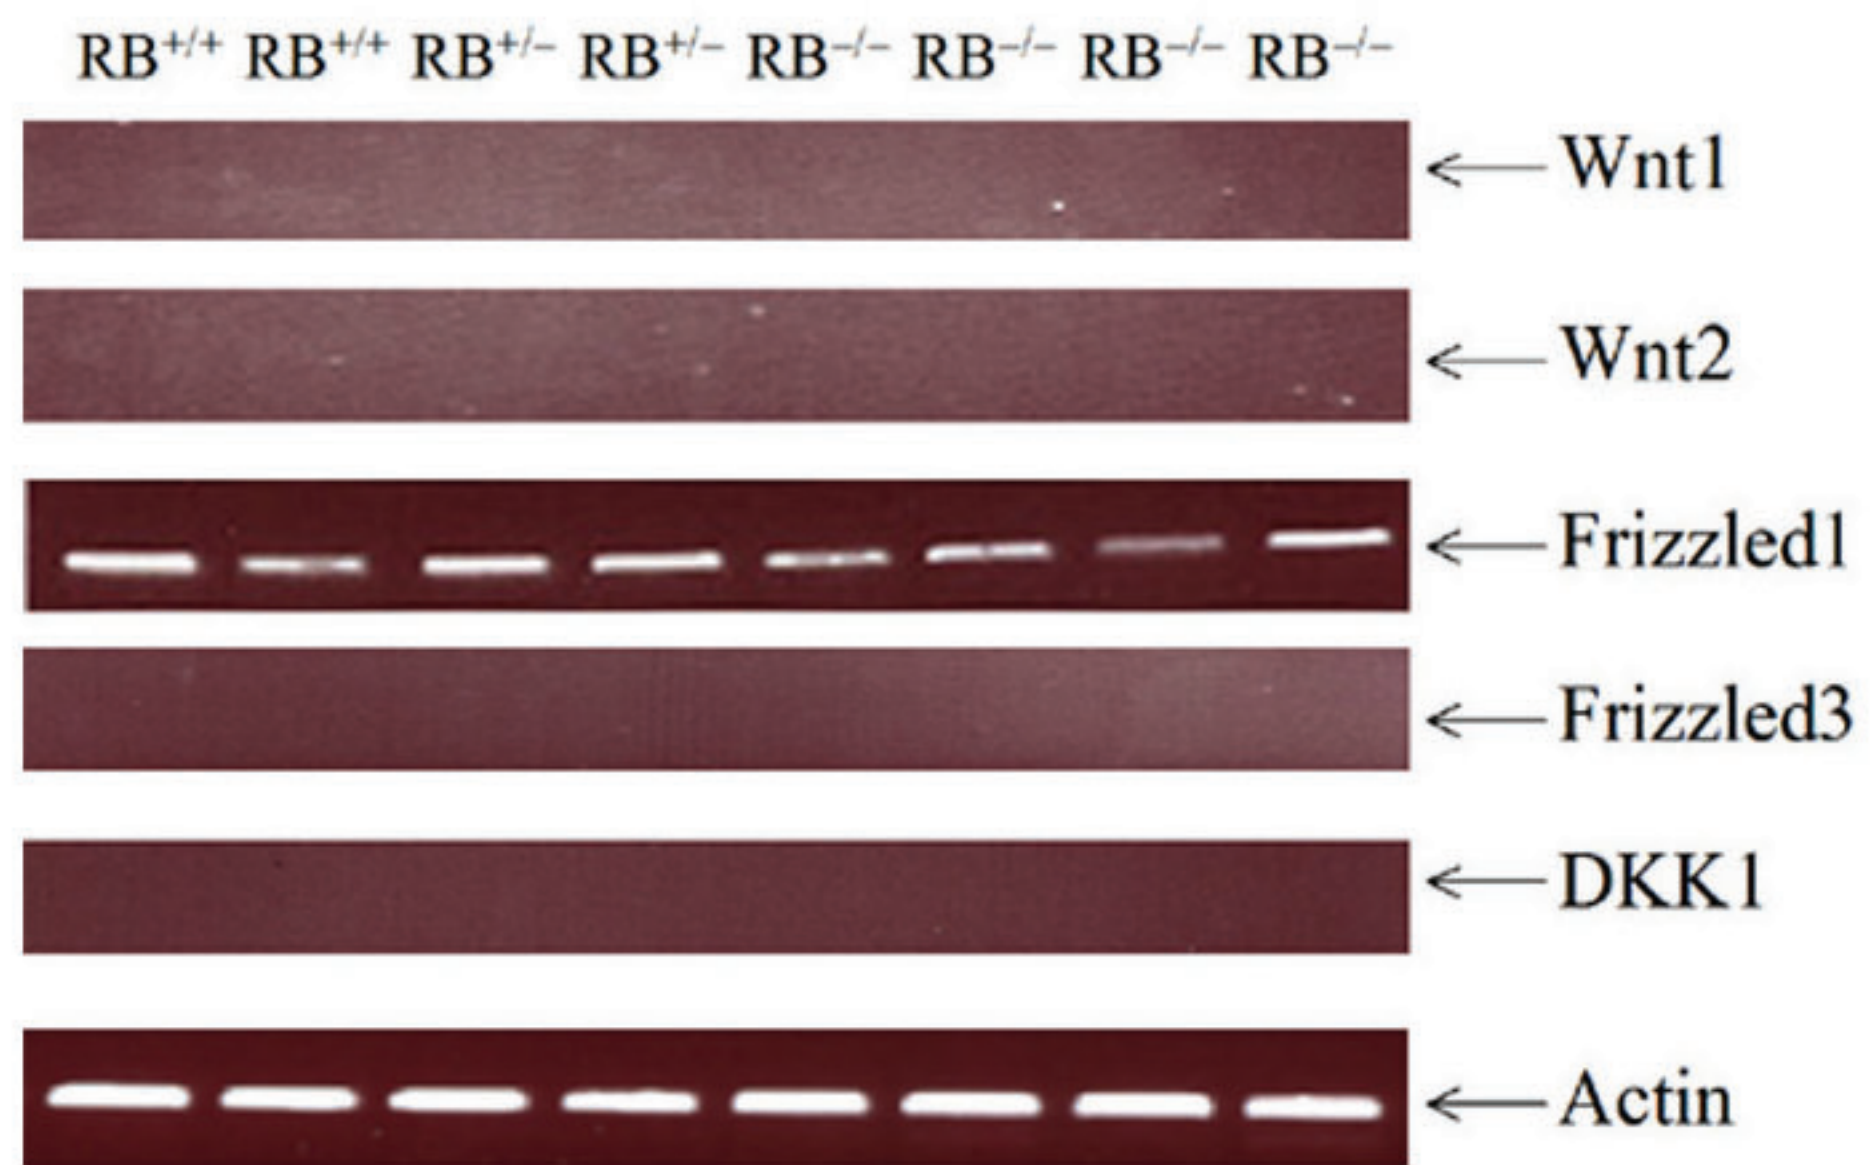

B

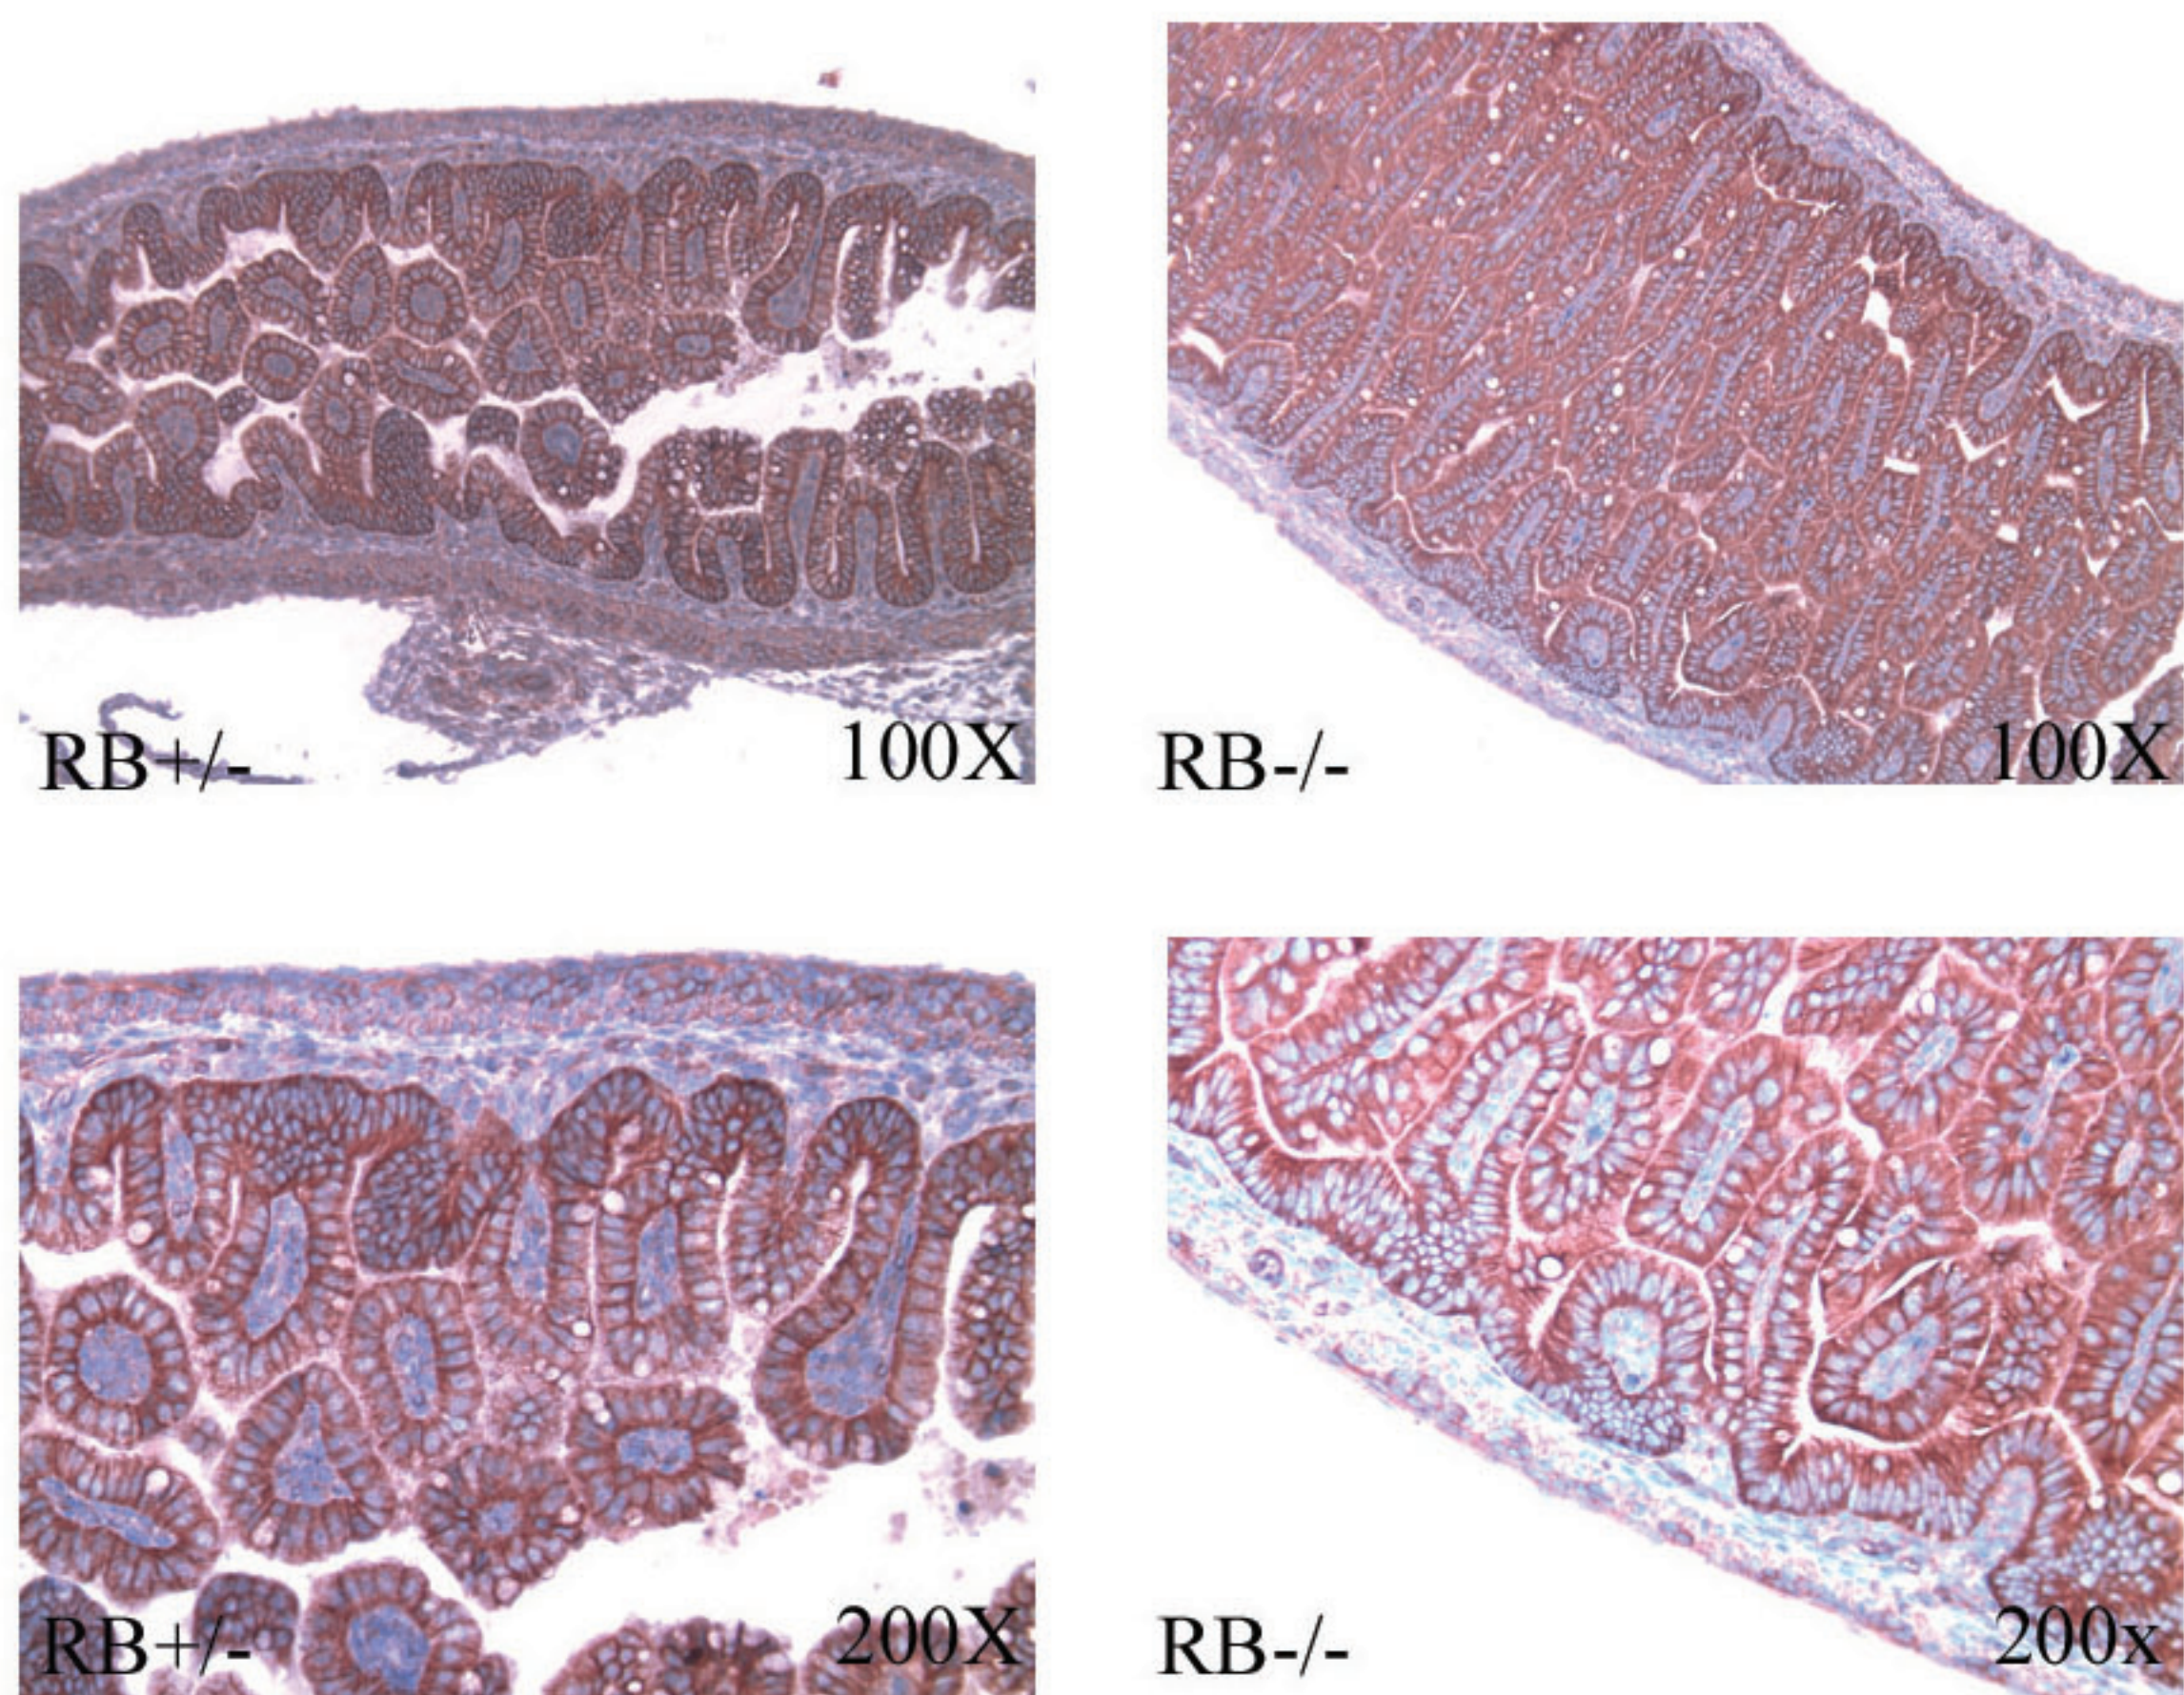

C

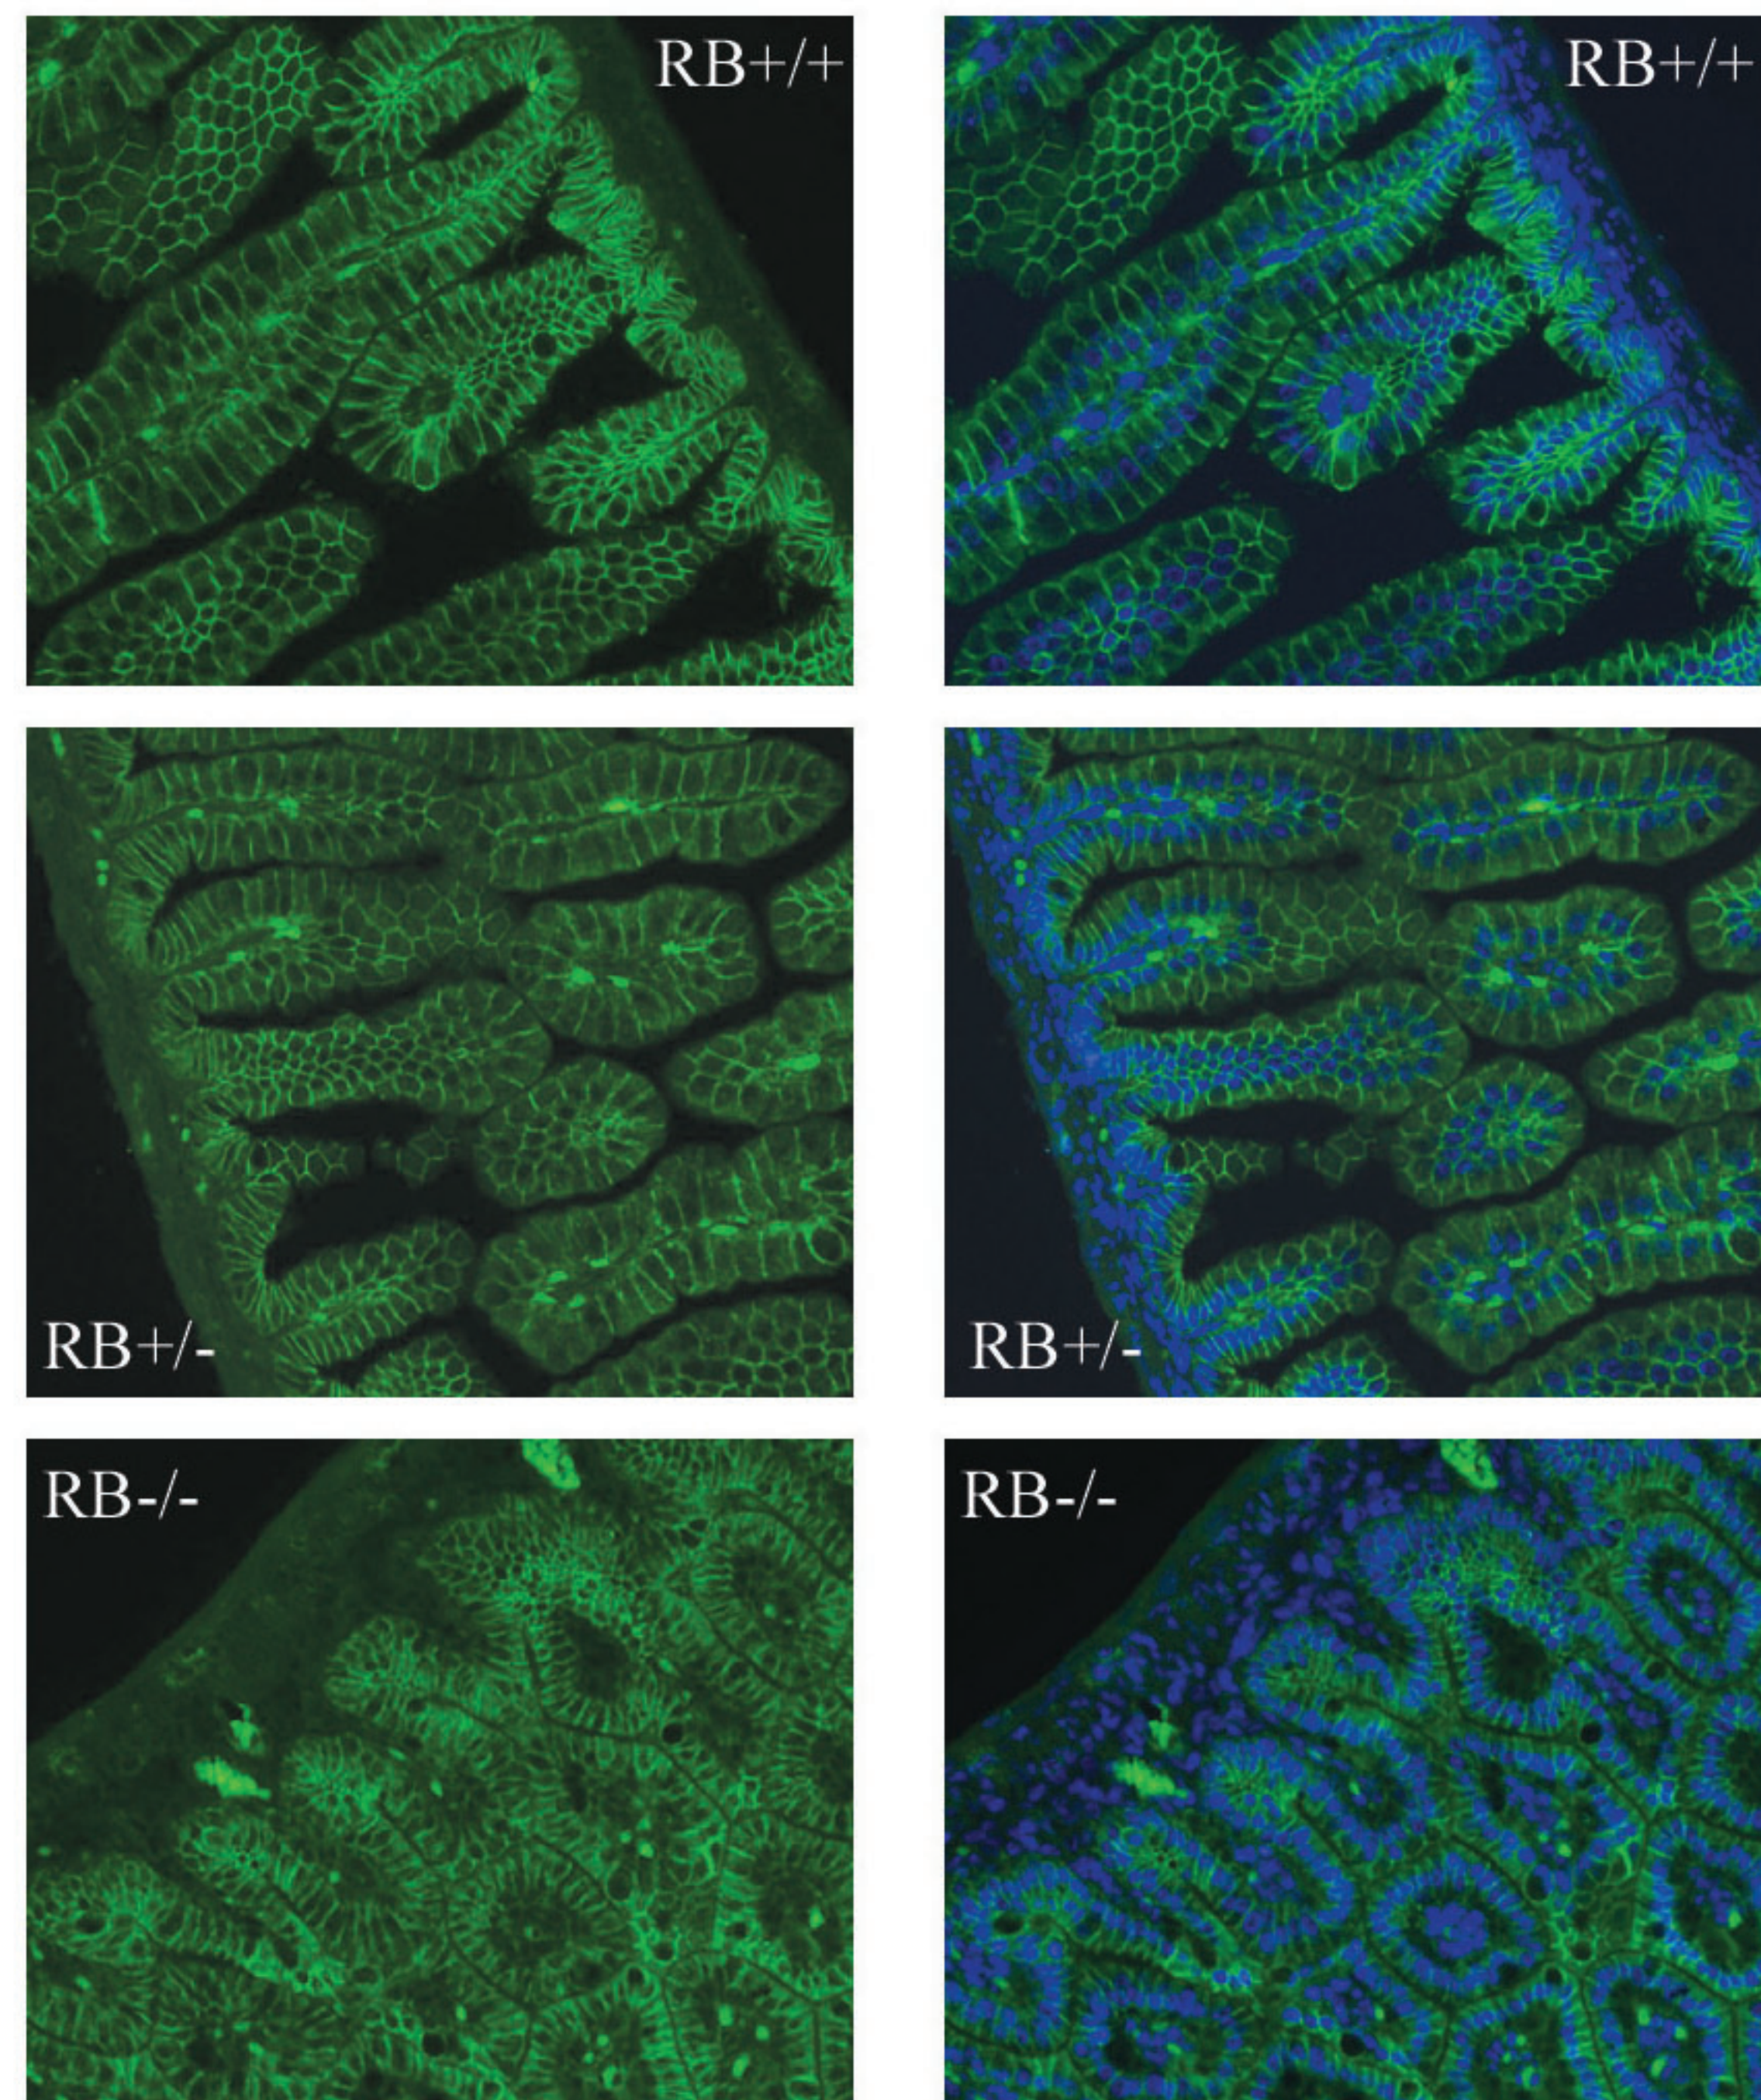

D

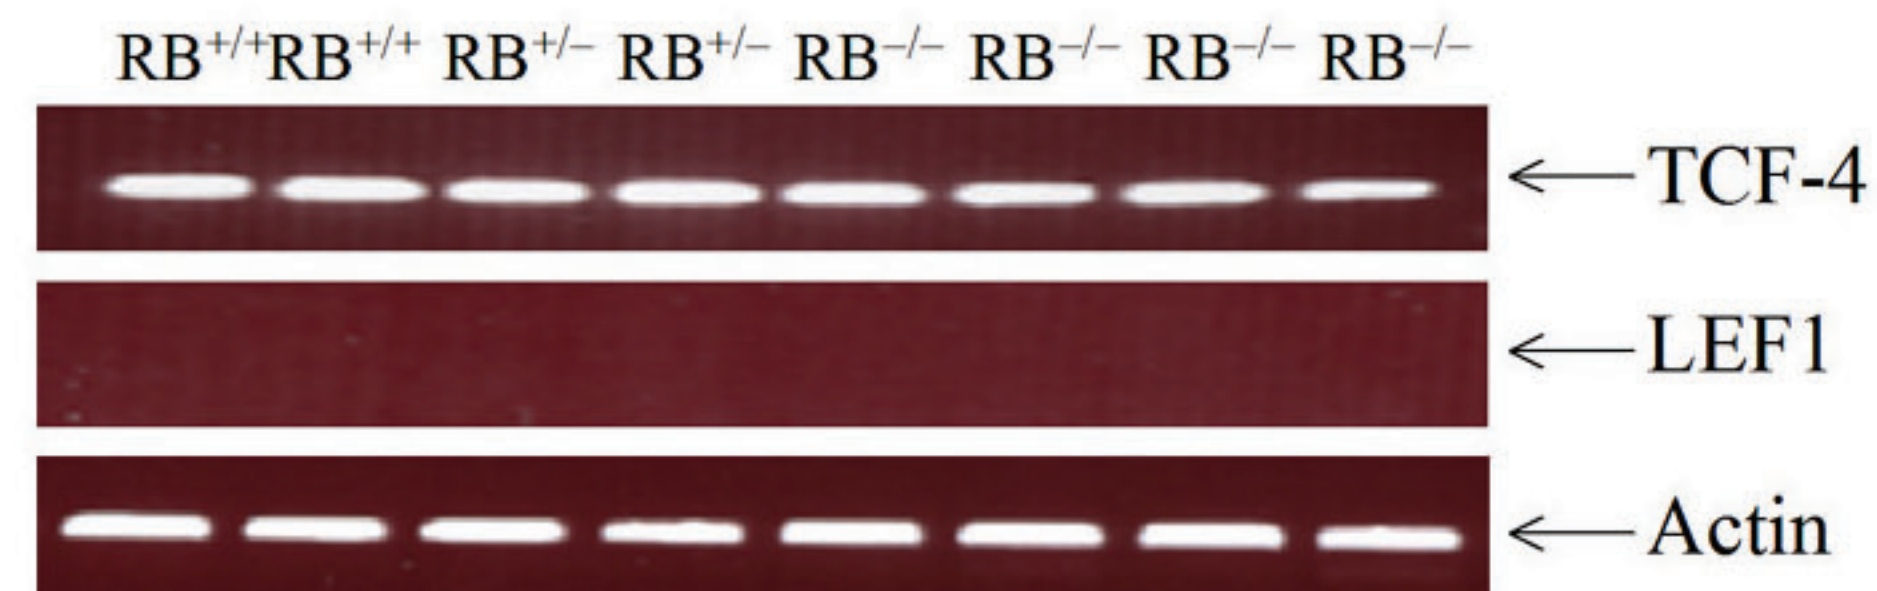

Supplement: Additional file 4 [file 1471-213x-7-6-s4.pdf]
